# Supplementary material for: Selectively cross-linked hydrogel-based cocktail drug delivery micro-chip for colon cancer combinatorial drug screening using AI-CSR platform for precision medicine
Source: Royal Society of Chemistry journal article supplement (doi:10.1039/d4lc00520a), 2024-01-01
Supplement: d4lc00520a1.pdf [file d4lc00520a1.pdf]

*Supplementary Information:*

**Selectively Cross-Linked Hydrogel-Based Cocktail Drug Delivery Micro-Chip for Colon Cancer**

**Combinatorial Drug Screening using AI-CSR platform for Precision Medicine**

Kiran Kaladharan<sup>a</sup>, Chih-Hsuan Ouyang<sup>a</sup>, Hsin-Yu Yang<sup>a</sup>, and Fan-Gang Tseng<sup>a,b,c,d\*</sup>

<sup>a</sup>Engineering and System Science, National Tsing Hua University, Hsinchu, Taiwan, R. O. C

<sup>b</sup>Institute of Nano Engineering and Micro Systems, National Tsing Hua University, Hsinchu, Taiwan.

<sup>c</sup>Department of Chemistry, National Tsing Hua University, Hsinchu, Taiwan.

<sup>d</sup>Research Center for Applied Sciences, Academia Sinica, Taipei, Taiwan, R. O. C.

\*Corresponding author emails: Fan-Gang Tseng ([fangang@ess.nthu.edu.tw](mailto:fangang@ess.nthu.edu.tw))

## Table of Contents:

**S1.** Chip fabrication process

**Fig. S1.** Selective crosslinking test of the hydrogel by UV and photomask.

**Fig. S2.** Cell growth curve of HCT116 cells

**Table. S1.** EC50 of ten drugs on HCT116

**Table. S2.** Three levels of concentrations of all the ten drugs used for the cocktail drug chip screening experiments based on AI-CSR platform.

**Table S3.** Comparison between conventional method and using Selectively Crosslinking Hydrogel Cocktail Chip

**S2.** References

### S1. Chip fabrication process

Polymethyl Methacrylate (PMMA) was selected as the substrate for crafting the channel mould. Initially, the substrate underwent precision cutting using a laser cutting machine, employing a 0.1mm knife with a cutting depth set at 0.05mm. Subsequently, the processed substrate was meticulously cleaned using alcohol to remove any residues. Following this, the substrate was immersed in an ultrasonic cleaner for a duration of 10 minutes to ensure the removal of any remaining particles on the surface. Turning our attention to the Polydimethylsiloxane (PDMS) mould, a meticulous procedure ensued. We employed a 10:1 ratio of PDMS A agent to PDMS B agent for the mould creation. The resulting chip, upon extraction from the mould, exhibited a thickness of approximately 2mm, a dimension determined to be optimal through rigorous testing and experimentation. This thickness ensures the chip's suitability for subsequent use in our experimental processes.

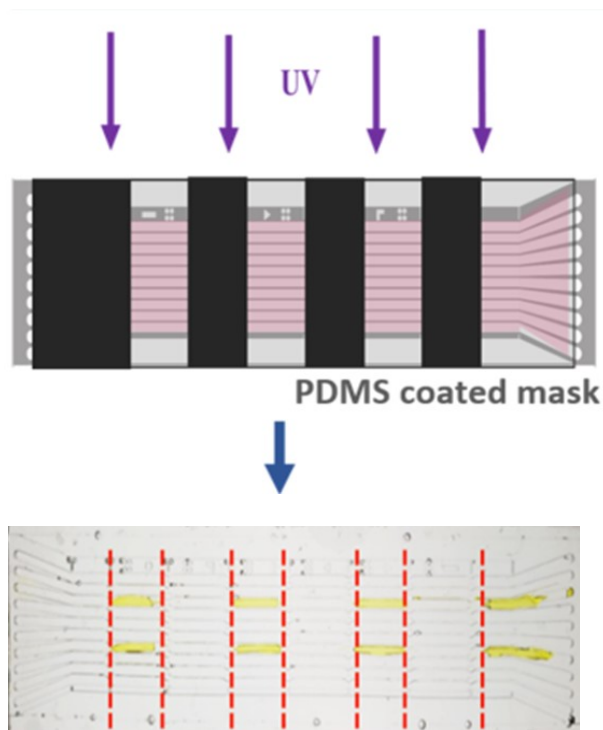

**Fig. S1.** Selective crosslinking test of the hydrogel by UV and photomask.

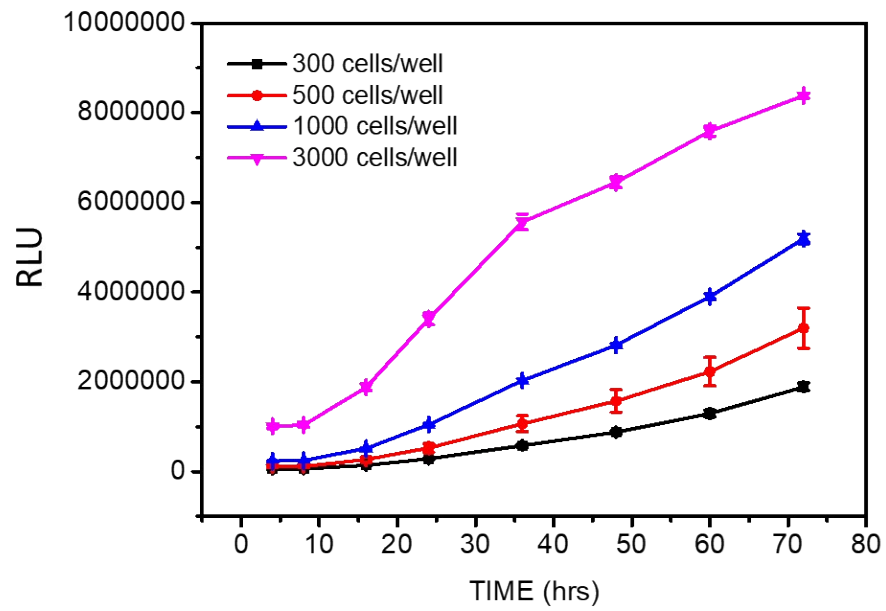

**Fig. S2.** Cell growth curve of HCT116 cells.

**Table S1:** Comparison EC50 values of ten drugs on HCT116 between drugs released from hydrogel and directly added to wells (cited from our group’s previously published paper).

|                     | EC 50 (released from hydrogel) ( $\mu\text{M}$ ) | EC 50 (directly added to well) ( $\mu\text{M}$ ) [1] |
|---------------------|--------------------------------------------------|------------------------------------------------------|
| <b>5-FU</b>         | 9.02                                             | 8.56                                                 |
| <b>Oxaliplatin</b>  | 9.52                                             | 10.28                                                |
| <b>Gemcitabine</b>  | 0.18                                             | 0.1832                                               |
| <b>Irinotecan</b>   | 0.02                                             | 0.01                                                 |
| <b>Folinic acid</b> | Resistance                                       | Resistance                                           |
| <b>Regorafenib</b>  | 4.97                                             | 5.88                                                 |
| <b>Lenvatinib</b>   | 26.71                                            | 28.47                                                |
| <b>Bevacizumab</b>  | Resistance                                       | Resistance                                           |
| <b>Cetuximab</b>    | Resistance                                       | Resistance                                           |
| <b>Panitumumab</b>  | Resistance                                       | Resistance                                           |

**Table S2:** Three levels of concentrations of all the ten drugs used for the cocktail drug screening experiments.

| Drugs               | Level ( $\mu\text{M}$ ) |          |          |
|---------------------|-------------------------|----------|----------|
|                     | EC0 (0)                 | EC10 (1) | EC20 (2) |
| <b>Regorafenib</b>  | 0                       | 2.53     | 3.45     |
| <b>Lenvatinib</b>   | 0                       | 2.78     | 6.56     |
| <b>5-FU</b>         | 0                       | 3.09     | 4.51     |
| <b>folinic acid</b> | 0                       | 10       | 20       |
| <b>Bevacizumab</b>  | 0                       | 0.1      | 0.2      |
| <b>Cetuximab</b>    | 0                       | 0.1      | 0.2      |
| <b>Panitumumab</b>  | 0                       | 0.1      | 0.2      |
| <b>Oxaliplatin</b>  | 0                       | 0.405    | 1.34     |
| <b>Irinotecan</b>   | 0                       | 0.124    | 8.03     |
| <b>Gemcitabine</b>  | 0                       | 0.0124   | 0.0335   |

**Table S3:** Comparison between conventional method, other similar methods and Selectively Crosslinking Hydrogel Cocktail Chip

|                                                                    | Number of drugs combined at one time | Reaction time  | Drug Timing Control                                         | Drug-Dose Combination Optimization                                                                                                            | Drug droplet evaporation                                               |
|--------------------------------------------------------------------|--------------------------------------|----------------|-------------------------------------------------------------|-----------------------------------------------------------------------------------------------------------------------------------------------|------------------------------------------------------------------------|
| <b>Conventional method</b> [1]                                     | Not applicable                       | ~1.5 hours     | Release all at once                                         | AI can be integrated                                                                                                                          | Not applicable                                                         |
| <b>UV-gel drug chip</b> [2]                                        | 5 drugs                              | Not applicable | Can control the drug release rate                           | Feedback System Control (FSC) approach                                                                                                        | Not applicable                                                         |
| <b>Microfluidic-Enabled Print-to-Screen Platform</b> [3]           | up to 3 drugs                        | Not applicable | Drug array printed all at once                              | Require more extensive testing without any AI based optimization                                                                              | Potential of droplet evaporation during and after the printing process |
| <b>Plug-and-Play, Drug-on-Pillar Platform</b> [4]                  | up to 3 drugs                        | Not applicable | Drug array printed all at once                              | A 1260-spot drug combination array to study drug effects                                                                                      | Potential of droplet evaporation during and after the printing process |
| <b>Selectively crosslinking Hydrogel Cocktail Chip (This work)</b> | up to 10 drugs                       | Not applicable | Can control the drug release rate by hydrogel concentration | AI-CSR platform to optimize drug-dose combinations across a 10-drug search space, enhancing precision and minimizing experimental iterations. | Not applicable                                                         |

## S2. References:

- [1] Advanced Therapeutics - 2023 - Yang - In Vitro Study on AI-PRS Enabled Precision Cocktail Drugs Design for Treating Human.pdf n.d.
- [2] Chen YT, Goudar VS, Wu RG, Hsieh HY, Yang CS, Chang HY, et al. A UV-sensitive hydrogel based combinatory drug delivery chip (UV gel-Drug Chip) for cancer cocktail drug screening. *RSC Adv* 2016;6:44425–34. <https://doi.org/10.1039/c6ra01733a>.
- [3] Ding Y, Li J, Xiao W, Xiao K, Lee J, Bhardwaj U, et al. Microfluidic-Enabled Print-to-Screen Platform for High-Throughput Screening of Combinatorial Chemotherapy. *Anal Chem* 2015;87:10166–71. <https://doi.org/10.1021/acs.analchem.5b00826>.
- [4] Quon G, Ajena Y, Lam KS, Pan T. screening implemented by microfluidic adaptive printing 2019;90:13969–77. <https://doi.org/10.1021/acs.analchem.8b03456.A>.
